# Supplementary material for: Memory CD8⁺ T Cells Co-expressing TCF1 and ID2 Combine Effector and Stem-like Functions in Persistent Infections
Source: Research Square preprint supplement (doi:10.21203/rs.3.rs-8047338/v1), 2025-11-17
Supplement: Supplementary file 1 [file 56c429202cac50786df89591.xlsx]

## Sheet: correlations with ID2
Correlations, gene expression HIV-specific CM CD8+ T single cells
Gene	Spearman r	-Log(p_adj)
IFNB1	0.232639	11.7047
IFNA1	0.229066	11.3072
CCL3	0.22595	10.9643
GZMB	0.225807	10.9546
VHL	0.211735	9.45693
CDC42	0.202554	8.53625
FASL	0.194963	7.80835
XCL1	0.192934	7.6223
TNFSF10	0.189877	7.3435
IL7R	0.18401	6.81683
RPS18	0.182599	6.69661
CCL3L1	0.171284	5.73215
MIF	0.166864	5.37552
TNF	0.163646	5.12337
CTLA4	0.150398	4.12098
HLA-DRB1	0.149649	4.07195
GZMK	0.143111	3.61314
B3GAT1	0.13566	3.1141
ACTB	0.113852	1.79268
CDKN1B	0.108641	1.51565
NT5E	0.107045	1.43767
BCL2	0.104637	1.31979
GAPDH	0.102859	1.23646
CD8A	0.0950173	0.872878
BATF	0.0948582	0.871549
FAS	0.0923693	0.769418
MYC	0.0887834	0.629101
RICTOR	0.0887969	0.629101
TNFRSF9	0.0862987	0.544861
BAX	0.085506	0.521346
FOXO3	0.0797343	0.335276
RHOA	0.0790547	0.320166
CCR7	0.0782351	0.301567
KLRK1	0.0763453	0.255202
BTLA	0.0743187	0.20984
HAVCR2	0.0723418	0.170489
PRKAA1	0.0721525	0.170489
STAT3	0.0702883	0.138172
CD274	0.0690085	0.119407
TP53	0.067009	0.0918689
PRKCA	0.0636223	0.0553263
RPTOR	0.0637657	0.0553263
IRF1	0.0578878	0.0173484
BCL6	0.0570255	0.0158881
CD69	0.0572843	0.0158881
HLA-DRA	0.0564681	0.0147688
GZMA	0.0528202	0.00562974
REPIN1	0.0525612	0.00562974
RPS6KB1	0.05184	0.00497592
EPAS1	0.0472411	0.0012417
LAG3	0.0476224	0.0012417
MTOR	0.047676	0.0012417
PRF1	0.0466191	0.00121904
CD160	0.0456604	0.00095458
BAD	0.0433583	0.00044647
CD244	-0.0435355	0.00044647
CD38	-0.0423693	0.00037429
TBX21	0.0379488	4.7351e-05
CD27	-0.037364	4.3453e-05
EOMES	-0.034836	1.2224e-05
ARNT	-0.0325531	6.5356e-06
BCL-XL	-0.0334173	6.5356e-06
CCR5	0.031275	6.5356e-06
CDKN1A	-0.0329445	6.5356e-06
IL10	0.0334176	6.5356e-06
MKI67	0.0317471	6.5356e-06
PRDM1	0.032626	6.5356e-06
BAG6	-0.0260662	2.9102e-06
CD28	-0.0273311	2.9102e-06
CD300A	0.022549	2.9102e-06
DTX1	-0.0274799	2.9102e-06
HIF1A	-0.0250952	2.9102e-06
IFNG	0.0236456	2.9102e-06
IL2	-0.0271084	2.9102e-06
IL2RA	0.0284275	2.9102e-06
LAMP1	0.027552	2.9102e-06
PBX3	0.027812	2.9102e-06
KLRG1	0.0204048	2.489e-06
SPRY2	0.0195371	2.489e-06
CXCR3	0.015189	1.9578e-07
SH2D1A	0.0149057	1.9578e-07
IL15	-0.0116284	5.268e-08
CCL5	0.00882598	2.862e-08
KLRD1	0.00991598	2.862e-08
OAS1	0.00845108	2.862e-08
SLC2A1	-0.00754981	2.862e-08
STAT4	0.00805663	2.862e-08
AKT1	-0.00011789	1.5157e-08
CASP8	0.00268954	1.5157e-08
CCL4	-0.00129502	1.5157e-08
ESRRA	-0.00153	1.5157e-08
FOXP3	-0.00198477	1.5157e-08
MX1	-0.00333336	1.5157e-08
NFATC1	0.00199813	1.5157e-08

## Sheet: correlations with T-bet
Correlations, gene expression HIV-specific CM CD8+ T single cells
Gene	Spearman r	-Log(p_adj)
CCL5	0.2478	13.0269
KLRD1	0.2529	13.0269
CD8A	0.2423	12.7352
CXCR3	0.236	12.0867
BCL6	0.1952	7.8226
GAPDH	0.1951	7.81488
EOMES	0.1912	7.45832
SH2D1A	0.1785	6.32122
PRF1	0.1715	5.731
IRF1	0.1685	5.48915
HIF1A	0.1558	4.50388
LAG3	0.1492	4.0178
CDKN1B	0.1482	3.94908
HLA-DRB1	0.1463	3.82245
BATF	0.1429	3.58445
OAS1	0.133	2.93224
PRKAA1	0.1278	2.60698
RHOA	0.1264	2.52317
KLRK1	0.1252	2.45591
STAT4	0.1252	2.45591
ACTB	0.1227	2.31651
RICTOR	0.1224	2.30158
MX1	0.1211	2.23158
NFATC1	0.1199	2.16619
CD300A	0.1196	2.15446
CD69	0.1158	1.941
XCL1	0.1156	1.94038
HLA-DRA	0.1154	1.93522
BAX	0.1136	1.83817
IL2	0.1128	1.80413
CCR5	0.1123	1.77953
LAMP1	0.1047	1.38731
TNFRSF9	0.1041	1.36257
CDKN1A	0.09772	1.05828
MTOR	0.09306	0.854615
IFNA1	-0.09142	0.791291
CCR7	0.09021	0.747367
BCL-XL	0.08988	0.740878
KLRG1	0.08811	0.675992
CDC42	0.08702	0.640257
FAS	0.08379	0.526624
CCL3L1	-0.08304	0.50678
IFNG	0.08145	0.458723
SLC2A1	0.08013	0.421903
TP53	0.07383	0.247117
RPS6KB1	0.07231	0.215887
STAT3	0.07175	0.208574
CD160	0.0702	0.180091
BTLA	0.06914	0.163866
IL2RA	0.06874	0.160937
MIF	0.06738	0.14326
TNF	-0.06753	0.14326
ESRRA	0.0647	0.105813
CD27	0.06238	0.0783025
GZMA	0.06036	0.0591387
GZMK	0.05998	0.0586331
PRKCA	-0.05989	0.0586331
EPAS1	0.05763	0.043443
BAG6	0.05462	0.0267046
GZMB	-0.05483	0.0267046
CD28	-0.05245	0.0187092
MYC	-0.05117	0.0152431
AKT1	0.0479	0.00723664
IL10	0.04474	0.00317108
ARNT	0.04324	0.0022824
RPTOR	0.04234	0.0022824
SPRY2	0.04327	0.0022824
IFNB1	-0.0388	0.000791495
B3GAT1	-0.03739	0.000714
CCL4	-0.03219	0.000714
DTX1	0.03789	0.000714
HAVCR2	0.03409	0.000714
ID2	0.03795	0.000714
IL15	0.03478	0.000714
MKI67	0.03398	0.000714
PBX3	0.03577	0.000714
RPS18	-0.03603	0.000714
REPIN1	0.02704	0.000125944
BAD	-0.02544	9.47267e-05
NT5E	-0.02536	9.47267e-05
CASP8	-0.02278	7.73171e-05
CD38	0.02001	3.42693e-05
PRDM1	-0.01876	3.42693e-05
FASL	-0.0142	4.83646e-06
TNFSF10	0.01182	2.41929e-06
CD244	0.009447	1.1706e-06
BCL2	-0.000594	1.13824e-06
CCL3	-0.007217	1.13824e-06
CD274	0.003301	1.13824e-06
CTLA4	-0.00784	1.13824e-06
FOXO3	0.003884	1.13824e-06
FOXP3	-0.004004	1.13824e-06
IL7R	0.000188	1.13824e-06
VHL	-0.005703	1.13824e-06
