# Supplementary material for: Memory CD8⁺ T Cells Co-expressing TCF1 and ID2 Combine Effector and Stem-like Functions in Persistent Infections
Source: Research Square preprint supplement (doi:10.21203/rs.3.rs-8047338/v1), 2025-11-17
Supplement: Supplementary file 2 [file dfdcbb30ef1e2e392c0a0a5f.xlsx]

## Sheet: TCF7+ID2+ vs TCF7-ID2+
scRNA-seq differentially expressed genes in TCF7+ID2+ vs TCF7-ID2+ SIV-sepcific CM9 CD8+ T cells
Gene	Average Log2 fold change	adjusted p Value
TCF7	2.25345	0
GZMM	1.48006	2.16311e-165
GZMB	-1.94924	3.49488e-120
CCL3	-1.12795	3.6827e-63
GZMA	-1.1747	1.09329e-62
CD160	0.226929	5.68497e-52
SELL (CD62L)	0.697578	8.90864e-47
CSF1	-0.813348	1.05406e-41
CTLA4	-0.509547	2.4946e-40
GCN1	0.316017	3.14239e-39
AOAH	0.336301	1.72856e-37
IGFBP2	0.826658	1.14129e-34
LITAF	-0.193887	2.6464e-32
ENSMMUG00000062917	-0.799863	4.21854e-32
ENSMMUG00000058233	-0.810115	1.47285e-30
ENSMMUG00000060606	0.188352	1.48064e-30
FASLG	-0.449934	9.74903e-29
PVRIG	0.348517	3.86688e-28
OSTF1	0.4859	6.35388e-27
CD83	0.249489	6.58777e-26
P2RY8	-0.294448	1.35054e-24
CTSW	0.398955	1.7821e-24
ENSMMUG00000054210	-0.936661	8.70712e-24
CMC1	0.429884	1.03789e-23
PLAAT3	0.212956	1.70506e-22
LAG3	-0.631811	2.55561e-22
KLF2	0.500978	1.05831e-21
PLAC8	0.317801	4.15643e-21
ENSMMUG00000063549	-0.504262	6.29931e-21
FTH1	0.30872	9.3121e-21
JUN	0.418845	5.09573e-20
LTB	0.404096	6.21871e-20
CCR2	-0.353801	9.74539e-20
CD48	0.240631	1.87186e-19
TNFRSF1B	-0.492519	2.81466e-19
SH2D1A	0.359972	1.0671e-18
BCL2A1	0.383945	1.69284e-18
HPCAL1	0.391584	2.32552e-18
FOS	0.370412	8.71156e-18
ENSMMUG00000040287	0.223416	2.60114e-17
DNAJC15	0.183	4.07053e-17
TNFSF9	-0.312796	9.67488e-17
HCFC1	-0.156546	1.53302e-16
DDIT4	0.16694	1.5557e-16
ASPM	-0.261148	1.82154e-16
IRF4	-0.253226	4.60266e-16
TMEM18	0.224906	8.59077e-16
PMAIP1	0.275608	1.11115e-15
CCR7	0.452943	3.02513e-15
ENSMMUG00000018157	0.198892	6.95808e-15
ENSMMUG00000056515	0.396946	1.30066e-14
CCL4L1	-0.505526	3.60948e-14
PDE4B	-0.227528	8.52734e-14
CRTAM	0.332546	1.20911e-13
APOBEC3D	-0.404419	1.43633e-13
HEG1	-0.152881	2.33221e-13
TSC22D3	0.324571	2.49841e-13
CD69	0.228232	6.85322e-13
H2AZ2	0.167659	9.36655e-12
TMSB10	0.164706	1.50393e-11
JUNB	0.32471	2.01337e-11
GPR183	0.318186	3.67636e-11
ENSMMUG00000054358	-0.566197	6.37952e-11
LMNA	-0.169161	8.31715e-11
ENSMMUG00000043894	-0.168433	8.70646e-11
GPRIN3	-0.340871	1.75821e-10
MCUB	0.352263	2.16638e-10
PPIA	0.189728	4.03546e-10
PLAAT4	0.170298	8.82685e-10
BTF3	0.177288	1.61429e-09
AHNAK	-0.395143	1.79897e-09
M6PR	0.269315	2.1592e-09
NIN	-0.192831	4.04376e-09
NOTCH1	-0.170424	4.3049e-09
TXNIP	0.217852	4.32795e-09
CD200	0.223031	5.06789e-09
STAT1	0.208791	5.46399e-09
ENSMMUG00000013256	0.173215	8.94232e-09
FAM184B	0.243759	1.42481e-08
CLIC1	-0.281918	2.45696e-08
S100A10	0.213772	3.52392e-08
RNASE4	-0.170792	3.60808e-08
CD52	0.165001	5.3901e-08
IL7R	0.281883	6.48334e-08
SPOCK2	-0.647784	6.68633e-08
PPP1R15A	0.257545	7.52413e-08
HINT2	0.160779	9.75658e-08
STX11	-0.296532	1.31131e-07
SLC7A5	-0.182153	1.49953e-07
CYCS	0.292755	1.53444e-07
LAMTOR4	0.28007	1.54998e-07
IL21	-0.318051	1.99161e-07
TIGAR	-0.481809	2.20713e-07
EOMES	0.229471	3.63753e-07
BATF	-0.216578	4.07885e-07
NKG2D	0.175586	5.00925e-07
ANXA5	-0.246955	5.21544e-07
KLF6	0.182492	5.58184e-07
DBN1	0.161313	6.0642e-07
FGR	0.229848	6.85588e-07
CIB1	0.256636	7.00372e-07
TAGAP	0.230402	7.14921e-07
ENSMMUG00000054565	0.160838	7.76682e-07
SCML4	0.216772	8.05497e-07
RGS10	0.185463	8.29776e-07
CYTB	-0.282664	1.85193e-06
SLC29A1	0.155529	1.98818e-06
LIMS1	-0.318893	2.25298e-06
NAB1	-0.170808	2.51356e-06
CLEC2D	-0.22849	2.56188e-06
COX1	-0.351603	4.62974e-06
ATM	0.226164	5.71601e-06
BAZ1B	-0.173415	8.50608e-06
KRT10	0.212908	9.20459e-06
IL10	-0.520123	9.74454e-06
FKBP5	0.155486	1.27518e-05
HSBP1L1	0.317247	1.28227e-05
MAPRE2	0.15188	1.3027e-05
CXCR6	-0.520529	1.34934e-05
IFNG	-0.425556	1.40158e-05
ACTN4	-0.245616	1.46571e-05
DUSP5	-0.361968	2.11479e-05
CLIP1	-0.157086	2.29839e-05
CTSC	-0.287734	2.54665e-05
ENSMMUG00000008111	-0.546325	3.90368e-05
SYNE2	-0.20738	4.41607e-05
SPAG9	-0.283591	4.47445e-05
ENSMMUG00000062103	0.161596	4.64847e-05
ENTPD1	-0.266259	5.94539e-05
PIM3	-0.150889	6.00397e-05
ATAD2	-0.182639	9.94516e-05
SAMSN1	-0.431189	0.000104565
CEP350	-0.216654	0.000130533
PRDM1	-0.40028	0.00016342
TOP2A	-0.237967	0.000192634
RGS1	-0.347412	0.000275953
CENPF	-0.368347	0.000340982
DNMT1	-0.262647	0.000606608
IGF2R	-0.378151	0.000639017
BOD1L1	-0.170622	0.000688882
ADGRE5	-0.410307	0.000774381
ATP8	-0.207199	0.000795868
RAPGEF2	0.167752	0.000960215
APOL6	-0.32489	0.00108538
ICOS	-0.340687	0.00125195
GLIPR1L2	-0.242901	0.00131667
PDCD1	-0.281372	0.00139468
CNN2	0.154279	0.00148559
RNF19A	-0.241239	0.00156039
SAT2	0.159062	0.00174537
SMARCE1	0.186729	0.00211671
PYHIN1	0.161398	0.00222865
PRF1	-0.286089	0.0025795
CXCR3	-0.248443	0.00281561
NBEAL2	-0.203533	0.0029332
NKG7	-0.194628	0.00298526
DDX60	-0.195173	0.00306151
STMN1	-0.232313	0.00326461
SMC4	-0.326906	0.00333276
RRM2	-0.191329	0.00378893
ENSMMUG00000063583	-0.506905	0.00494077
FAM3C	-0.220615	0.00568149
ENSMMUG00000061081	0.166998	0.00728448
HOPX	-0.262738	0.00827293
SH2D2A	-0.224887	0.00962885
GEM	0.150635	0.0110039
ENSMMUG00000059280	-0.211931	0.0111672
PTGER4	-0.200846	0.0115133
ITGB7	-0.192695	0.01281
ICAM2	0.220963	0.0132458
RAB24	-0.161496	0.0142389
FLT3LG	0.154726	0.0161991
TOPBP1	-0.184512	0.0182274
ENSMMUG00000057079	-0.215725	0.0199129
CMA1	-0.295387	0.0206586
TGFB1	-0.191863	0.0236067
HIGD2A	0.162978	0.023983
PARP14	-0.173384	0.0295142
SYTL2	-0.373192	0.0300493
MMD	0.154095	0.0344077
COA1	0.151515	0.0384042
SPEN	-0.156829	0.0417339
H1-5	-0.235242	0.0493939
TTC39C	-0.198275	0.0594626
ACOT7	0.18805	0.0810579
EPSTI1	-0.271306	0.0936028
APOL2	-0.170848	0.122578
ENSMMUG00000015274	-0.211223	0.13566
CDK2AP2	-0.18994	0.138674
BCL2	-0.189589	0.216747
SERPINB1	-0.193832	0.236878
RNF213	-0.203437	0.26227
RBFA	0.17422	0.268599
ENSMMUG00000061146	0.197497	0.288119
U5.18	-0.196417	0.376058
ENSMMUG00000039070	-0.288675	0.436385
FAM107B	-0.179396	0.446011
KLRB1	-0.332171	0.518318
TTC24	0.297398	0.659794
CPD	-0.192719	0.662407
ENSMMUG00000058532	-0.366878	0.77535
H1-3	-0.268886	0.842465
PECAM1	0.178134	0.91434
CDKN2D	0.260081	1
PIK3R1	-0.180894	1
ENSMMUG00000061750	-0.24396	1
DDX39A	-0.216907	1
ENSMMUG00000004633	-0.159135	1
ND5	-0.190867	1
HSPH1	-0.162769	1
RGCC	-0.243688	1
EZR	-0.199904	1
VPS37B	-0.215292	1
ENSMMUG00000064184	-0.235303	1
ND6	-0.268787	1
IL10RA	-0.188691	1
OTULINL	-0.186231	1
CD82	-0.182327	1
ID3	-0.151556	1
ISG15	-0.216863	1
ENSMMUG00000028701	-0.201951	1
CX3CR1	-0.154259	1
GOLGB1	-0.178866	1
BHLHE40	-0.253028	1
STING1	-0.169562	1
ITGB1	-0.191573	1
LFNG	-0.249072	1
CHI3L2	-0.202934	1
COX3	-0.312823	1
PARP6	-0.195635	1
FLNA	-0.236361	1
ENSMMUG00000003532	-0.216303	1
IQGAP1	-0.17592	1
LMO4	-0.188152	1
TPM4	-0.213801	1
HMGB1	-0.168938	1
SYTL3	-0.287116	1
COX2	-0.17694	1
IL2RB	-0.224555	1
ENSMMUG00000064140	0.201185	1
JAML	-0.197029	1
ADAM23	-0.162512	1
ENSMMUG00000061756	-0.164312	1
ENSMMUG00000040343	-0.209569	1
SERPINB9	-0.173666	1
ENSMMUG00000052424	-0.410248	1
GADD45B	-0.177885	1
BCL2L11	-0.170705	1
ENSMMUG00000053137	-0.262863	1
SLA	-0.209916	1
ENSMMUG00000054409	-0.240438	1
NR4A2	-0.164953	1
ENSMMUG00000054501	-0.158696	1
TMEM154	0.226399	1
NUSAP1	-0.165142	1
TIMD4	-0.161873	1
HMGB2	-0.380928	1
ENSMMUG00000051300	-0.325035	1
ENSMMUG00000057062	0.285331	1
ENSMMUG00000063859	-0.180583	1
ENSMMUG00000042343	-0.51066	1
MKI67	-0.608479	1
CCDC186	-0.160486	1
UBALD2	-0.188593	1
MYRF	0.153993	1
RESF1	-0.2658	1
PPP3CA	-0.180052	1
ND4	-0.178061	1
TMPO	-0.176667	1
SOCS1	0.172336	1
ARHGAP11A	-0.151498	1
SERPINA1	0.306163	1
BTLA	0.182922	1
DEK	-0.152862	1
LGALS3	-0.160937	1
ENSMMUG00000063185	0.196958	1
SYPL1	0.183994	1
IL6ST	-0.155326	1
CENPE	-0.157024	1
PTPN7	-0.183195	1
CEBPB	-0.168824	1
CGA	-0.204546	1
IGFLR1	-0.20191	1
ZFP36L1	-0.19336	1
OASL	-0.205018	1
ENSMMUG00000065238	-0.2085	1
LMNB1	-0.203227	1
CD2AP	0.159289	1
TBC1D7	-0.165699	1

## Sheet: TCF7+ID2+ vs TCF7+ID2-
scRNA-seq differentially expressed genes in TCF7+ID2+ vs TCF7+ID2- SIV-sepcific CM9 CD8+ T cells
Gene	Average Log2 fold change	adjusted p Value
ID2	2.49857	0
CD69	0.265102	8.05685e-09
FOS	0.242005	1.0117e-05
TSC22D3	0.276399	3.75315e-05
PMAIP1	0.215448	9.81147e-05
JUNB	0.239327	0.00291807
JUN	0.191995	0.00427485
KLF6	0.158766	0.0100416
DUSP1	0.160631	0.0104138
CMC1	0.165265	0.0283834
ENSMMUG00000060606	0.152003	0.0455989
NR4A2	0.173849	0.117365
PRDX6	0.164235	0.138422
TAGAP	0.181768	0.156409
SCML4	0.187896	0.185109
SMC4	-0.256897	0.198539
PNMA1	0.171024	0.278888
SLC29A1	0.168638	0.394135
CSRNP1	0.180488	0.83089
CEBPB	-0.150368	1
ENSMMUG00000058037	0.155067	1
DUSP2	0.206683	1
GZMB	-0.272569	1
IFIT1	-0.233336	1
CD83	0.151008	1
ENSMMUG00000062085	-0.160296	1
CTSW	0.150435	1
STK38	-0.236558	1
CEP350	-0.157235	1
AHNAK	-0.244781	1
CYTB	-0.154973	1
CXCR4	0.156758	1
CYCS	0.172448	1
ENSMMUG00000028701	-0.169651	1
SECISBP2	-0.151207	1
BHLHE40	0.191238	1
COX3	-0.190239	1
ENSMMUG00000054358	-0.308258	1
ENSMMUG00000062897	-0.185684	1
ENSMMUG00000054210	0.231794	1
ENSMMUG00000008111	0.217137	1
FLNA	-0.20147	1
CENPF	-0.203579	1
GOLGB1	-0.167418	1
ID3	-0.169369	1
ENSMMUG00000051300	-0.262884	1
CGA	-0.205208	1
COX1	-0.182587	1
IKZF2	-0.15338	1
GZMA	-0.170401	1
CXCR6	-0.152312	1
GSTA4	-0.224726	1
STMN1	-0.164135	1
HMGB2	-0.204969	1
EIF2AK2	-0.193716	1
RRM2	-0.29562	1
ENSMMUG00000064692	-0.158055	1
ENSMMUG00000052424	-0.225772	1
PCLAF	-0.18378	1
MKI67	-0.403005	1
ENSMMUG00000065238	-0.174005	1
